# Supplementary material for: Dietary Supplementation with Sugar Beet Fructooligosaccharides and Garlic Residues Promotes Growth of Beneficial Bacteria and Increases Weight Gain in Neonatal Lambs
Source: MDPI journal article supplement (doi:10.3390/biom10081179), 2020-08-13
Supplement: s1 [file s1]

**Supplementary File 1. Mean daily weight gain of lambs at the end of the study (25 days) and serum immunoglobulins concentration in lambs.** Differences were considered significant when  $p$  value < 0.05. SD = standard deviation.

|                        | Mean                | SD     | Mean                 | SD    | $p$ value |
|------------------------|---------------------|--------|----------------------|-------|-----------|
|                        | <b>Control-diet</b> |        | <b>Additive-diet</b> |       |           |
| Mean daily weight gain | 239                 | 38.5   | 301                  | 62    | 0.001     |
| <b>Day 2</b>           |                     |        |                      |       |           |
| IgG (mg/ml)            | 7.8                 | 3.55   | 7.87                 | 3.968 | 0.991     |
| IgA (mg/ml)            | 6.83                | 6.334  | 7.51                 | 5.861 | 0.775     |
| IgM (mg/ml)            | 1.87                | 0.958  | 2.21                 | 0.633 | 0.22      |
| <b>Day 16</b>          |                     |        |                      |       |           |
| IgG (mg/ml)            | 5.02                | 1.738  | 4.9                  | 1.415 | 0.991     |
| IgA (mg/ml)            | 23.76               | 10.591 | 20.59                | 8.909 | 0.283     |
| IgM (mg/ml)            | 2.96                | 1.545  | 3.21                 | 0.921 | 0.641     |

**Supplementary File 2. Sequences per sample, alpha diversity indices and Good's estimated sample coverage for 16S rRNA gene amplicons analyzed in this study.**

| <b>Description</b> | <b>Sequences<br/>per sample</b> | <b>Chao1</b> | <b>Shannon</b> | <b>Simpson</b> | <b>Observed<br/>ASVs</b> | <b>Good's<br/>coverage</b> |
|--------------------|---------------------------------|--------------|----------------|----------------|--------------------------|----------------------------|
| Additive-diet lamb | 112,749                         | 153.56       | 4.46           | 0.91           | 153.56                   | 1.00                       |
| Control-diet lamb  | 92,638                          | 202.14       | 5.38           | 0.95           | 202.14                   | 1.00                       |

**Supplementary File 3 LEfSe analysis of the 100 most abundant ASVs found in lamb feces.**

Differences in relative abundances of ASVs between additive- and control-diet lamb groups were considered when  $p$  value < 0.05. Taxonomy assignation was performed according to SILVA database.

LDA = Linear Discriminant Analysis

Attached document: Supplementary\_File\_3.Lamb-ASV-LEfSe.xlsx
